# Supplementary material
Source: PubMed Central journal article supplement (PMC7583328)
Supplement: Supp_Fig2.pdf [file Supp_Fig2.pdf]

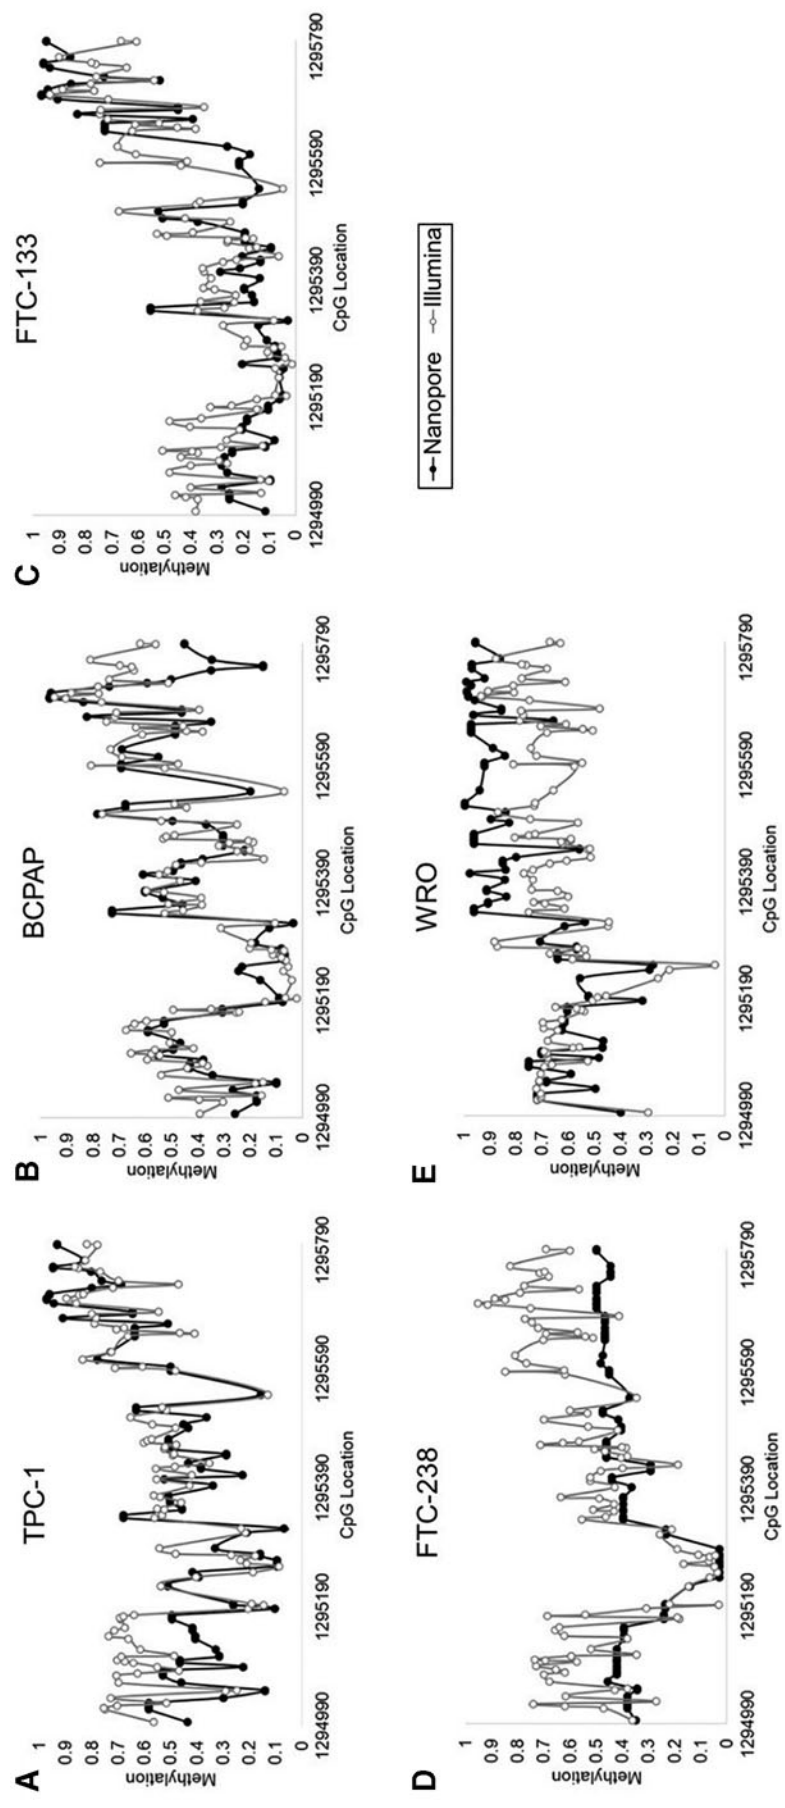

**SUPPLEMENTARY FIG. S2.** Methylation calls for Illumina bisulfite sequencing and nCATS are similar. Illumina bisulfite sequencing (gray) at the *TERT* promoter region compared with nCATS (black) in the same region in thyroid cancer cell lines (A) TPC-1 (B) BCPAP (C) FTC-133 (D) FTC-238, and (E) WRO shows overall concordance in methylation calls. nCATS, nanopore Cas9 targeted sequencing; *TERT*, telomerase reverse transcriptase.
