# Supplementary material
Source: PubMed Central journal article supplement (PMC7583328)
Supplement: Supp_Fig4-Tables1-2.pdf [file Supp_Fig4-Tables1-2.pdf]

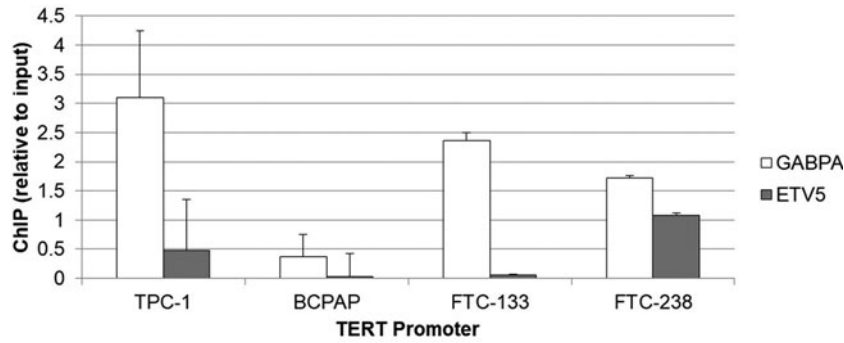

**SUPPLEMENTARY FIG. S4.** *GABPA* binds more abundantly than *ETV5* at the *TERT* promoter in all thyroid cancer cell lines. Binding was measured relative to 5% input chromatin in the indicated cell lines by ChIP-qPCR for *GABPA* and *ETV5*. All error bars represent standard error within triplicates. *ETV5*, ETS variant 5; *GABPA*, GA binding protein transcription factor subunit alpha.

**SUPPLEMENTARY TABLE S1. PRIMERS FOR CHROMATIN IMMUNOPRECIPITATION ANALYSIS**

| Primer name                 | Product size (bp) | Sequence                                           |
|-----------------------------|-------------------|----------------------------------------------------|
| <i>MYC</i> <sup>7</sup>     | 107               | F: GGGCTCCCAGTGGATTC<br>R: CGGAGCTGGAAGGTGAAG      |
| <i>GABPA</i> <sup>7</sup>   | 163               | F: CACCCGTCCTGCCCTTCA<br>R: CTGCCTGAAACTCGCGCC     |
| H3K4me3<br><i>Actin</i> (+) | 83                | F: CGGCCAACGCCAAAACCT<br>R: CCCTCTCCCCTCCTTTTGC    |
| <i>MYT1</i> (-)             | 135               | F: ACAAAGGCAGATACCCAACG<br>R: GCAGTTTCAAAAAGCCATCC |
| <i>TERT</i> <sup>6</sup>    | 163               | F: CACCCGTCCTGCCCTTCA<br>R: CTGCCTGAAACTCGCGCC     |
| H3K27me3<br><i>MYT1</i> (+) | 135               | Above                                              |
| <i>Actin</i> (-)            | 83                | Above                                              |
| <i>TERT</i>                 | 163               | Above                                              |

Citation denotes primers from previously published articles. (+) denotes the positive control gene locus, and (-) denotes the negative control gene locus.

F, forward; R, reverse.

**SUPPLEMENTARY TABLE S2. PRIMERS FOR ALLELE-SPECIFIC EXPRESSION ANALYSIS**

| Primer name        | Product size (bp) | Sequence (5'→3')                                    |
|--------------------|-------------------|-----------------------------------------------------|
| <i>TERT</i> Exon 2 | 214               | F: CGTGGTTTTCTGTGTGGTGTCT<br>R: CCTTGTCGCTGAGGAGTAG |
| <i>TERT</i> 3'UTR  | 362               | F: CACTGCCCTCAGACTTCAA<br>R: GGGATGGACTATTCTATGTGG  |

Sanger sequencing was conducted utilizing the forward primer for each amplicon.
